# Supplementary material for: A novel synthesis of calix[4]thiophenes and calix[4]furans
Source: Royal Society of Chemistry journal article supplement (doi:10.1039/c0cc00437e), 2010-01-01

## Supporting Information

### A Novel Synthesis of Calix[4]thiophenes and Calix[4]furans

Gon-Ann Lee,\* Wen-Chieh Wang, Minghuey Shieh and Ting-Shen Kuo

*Department of Chemistry, Fu Jen Catholic University, Hsinchuang, Taipei 24205,  
Taiwan, Republic of China*

*E-mail: [016850@mail.fju.edu.tw](mailto:016850@mail.fju.edu.tw)*

#### Table of Contents

##### General

|                                                                            |         |
|----------------------------------------------------------------------------|---------|
| Experimental procedures and characterization data for all compounds.....   | S2-S6   |
| <sup>1</sup> H and <sup>13</sup> C-NMR spectra of compound <b>10</b> ..... | S7-S8   |
| <sup>1</sup> H and <sup>13</sup> C-NMR spectra of compound <b>14</b> ..... | S9-S10  |
| <sup>1</sup> H and <sup>13</sup> C-NMR spectra of compound <b>15</b> ..... | S11-S12 |
| <sup>1</sup> H and <sup>13</sup> C-NMR spectra of compound <b>16</b> ..... | S13-S14 |
| <sup>1</sup> H and <sup>13</sup> C-NMR spectra of compound <b>17</b> ..... | S15-S16 |
| <sup>1</sup> H and <sup>13</sup> C-NMR spectra of compound <b>18</b> ..... | S17-S18 |
| <sup>1</sup> H and <sup>13</sup> C-NMR spectra of compound <b>19</b> ..... | S19-S20 |
| <sup>1</sup> H and <sup>13</sup> C-NMR spectra of compound <b>20</b> ..... | S21-S22 |

## General

Melting points were measured with a Barloworld SMP3 melting point apparatus and were uncorrected. NMR spectra were measured in CDCl<sub>3</sub> solution with a Bruker AC-300 MHz NMR spectrometer, with CHCl<sub>3</sub> as the internal standard. Chemical shifts ( $\delta$ ) are expressed in ppm downfield from tetramethylsilane. Coupling constants ( $J$ ) are expressed in hertz (Hz). Mass spectra were measured with a Finnigan/Thermo Quest MAT 95XL mass spectrometer. The elemental analyses were recored on a Elementar vario EL III elemental analyzer. Infrared spectra were recorded on KBr pellets. Flash column chromatography was performed on silica gel (230 mesh). Solvents are of reagent grade.

## Experimental procedures and characterization data for all compounds.

### Synthesis of 1-(2-thienyl)cyclooctanene (**9**)

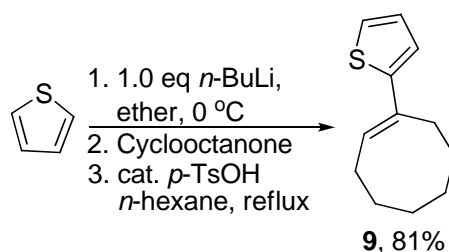

To a stirred solution of thiophene (10.0 g, 0.12 mol) in 100 mL of dry ether at 0 °C was added *n*-butyllithium (1.6 M in hexane, 75 mL, 0.12 mol) dropwise from a syringe. The mixture was stirred at 0 °C for 1 h, and cyclooctanone (15.14 g, 0.12 mol) was added. The mixture was allowed to warm to rt and stirred overnight. The mixture was poured into a 250-mL beaker with 100 g of crushed ice. The organic layer was separated and washed with water and brine, and then dried over anhydrous magnesium sulfate. After filtration, the solvent was removed on a rotary evaporator. To a stirred solution of crude alcohol in 100 mL of *n*-hexane was added catalytic amount of *p*-TsOH and the mixture was refluxed for 12 h. The *n*-hexane solution was dried over anhydrous K<sub>2</sub>CO<sub>3</sub>. After filtration, the solvent was removed and distilled to give **9** (81-82 °C / 0.1 torr, 18.7 g, 81%).  $\delta_{\text{H}}$ (300 MHz; CDCl<sub>3</sub>) 7.08 (1 H, dd,  $J$  1.7 and 4.6, thiophene  $\alpha$ -H), 6.98-6.94 (2 H, m, thiophene  $\beta$ -H), 6.17 (1 H, t,  $J$  8.3, olefinic), 2.66-2.62 (2 H, m, cyclooctyl), 2.30-2.23 (2 H, m, cyclooctyl), 1.72-1.64 (2 H, m, cyclooctyl), 1.62-1.50 (6 H, m, cyclooctyl);  $\delta_{\text{C}}$ (75 MHz; CDCl<sub>3</sub>) 147.1 (C), 134.3 (C), 127.2 (CH), 126.8 (CH), 122.8 (CH), 121.7 (CH), 30.2 (CH<sub>2</sub>), 28.9 (CH<sub>2</sub>), 28.4 (CH<sub>2</sub>), 27.3 (CH<sub>2</sub>), 26.9 (CH<sub>2</sub>), 26.0 (CH<sub>2</sub>).

### NIS-catalyzed tetramerization of 1-(2-thienyl)cyclooctene.

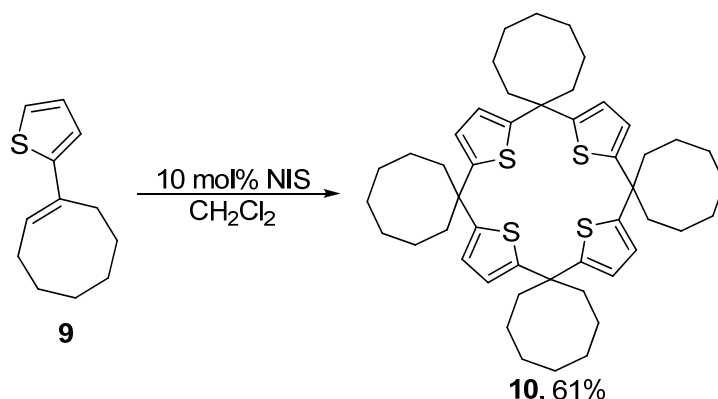

To a stirred solution of compound **9** (1g, 5.2 mmol) in 10 mL of CH<sub>2</sub>Cl<sub>2</sub> was added 10 mol% of NIS (0.117 g, 0.52 mmol) and the mixture was stirred at rt for 72 h. The solvent was removed under reduced pressure and the residue was purified by flash column chromatography (5% EtOAc in toluene) to afford white solid **10** (0.61 g, 61%). mp 361-362 °C; (Found: C, 74.58; H, 8.37. C<sub>48</sub>H<sub>64</sub>S<sub>4</sub> requires C, 74.94; H, 8.39%);  $\nu_{\max}$ (film)/cm<sup>-1</sup> 3095, 3079, 3063, 2922, 2850, 1638, 1618, 1477, 1446, 785, 759;  $\delta_{\text{H}}$ (300 MHz; CDCl<sub>3</sub>) 6.61 (8 H, s, thiophene  $\beta$ -H), 2.31-2.13 (16 H, br m, cyclooctyl), 1.66-1.42 (40 H, br m, cyclooctyl);  $\delta_{\text{C}}$ (75 MHz; CDCl<sub>3</sub>) 155.3 (C), 120.2 (CH), 47.6 (C), 35.8 (CH<sub>2</sub>), 28.5 (CH<sub>2</sub>), 24.9 (CH<sub>2</sub>), 22.9 (CH<sub>2</sub>); MS (FAB)  $m/z$  768 (M<sup>+</sup>, 4), 136 (100); HRMS (FAB) Calcd for C<sub>48</sub>H<sub>64</sub>S<sub>4</sub>  $m/z$  768.3891 (M<sup>+</sup>), found 768.3887. CCDC 768516.

### General procedure for the synthesis of calix[4]arenes (**10**, **14-20**) from thiophene and furan. Exemplified for compound **10**.

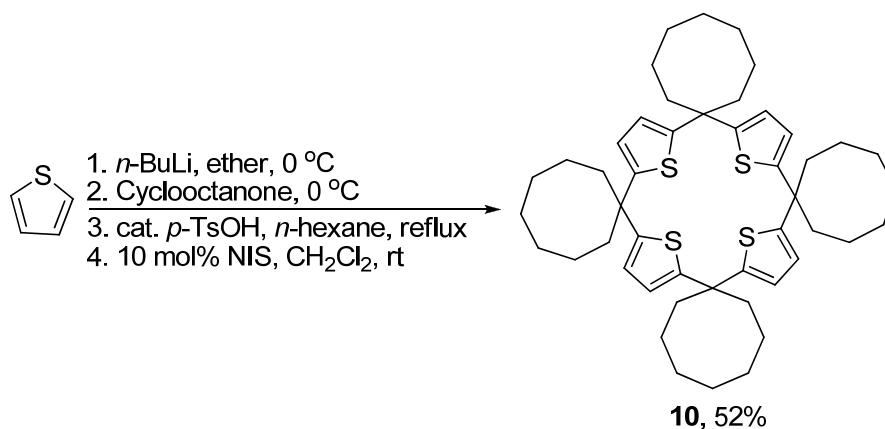

To a stirred solution of thiophene (1.0 g, 11.9 mmol) in 100 mL of dry ether at 0 °C was added *n*-butyllithium (1.6 M in hexane, 7.4 mL, 11.9 mmol) dropwise from a syringe. The mixture was stirred at 0 °C for 1 h, and cyclooctanone (1.5 g, 11.9 mmol) was added. The mixture was allowed to warm to rt and stirred overnight. The mixture was poured into a 250-mL beaker with 100 g of crushed ice. The organic layer was separated and washed with water and brine, and then dried over anhydrous magnesium sulfate. After filtration, the

solvent was removed on a rotary evaporator. To a stirred solution of crude alcohol in 100 mL of *n*-hexane was added catalytic amount of *p*-TsOH and the mixture was refluxed for 12 h. The *n*-hexane solution was dried over anhydrous K<sub>2</sub>CO<sub>3</sub>. After filtration, the solvent was removed under reduced pressure. The alkene was used without further purification. To a CH<sub>2</sub>Cl<sub>2</sub> (20 mL) solution of crude 1-(2-thienyl)cyclooctene (1.97 g) was added 10 mol% of NIS (0.25 g) and the mixture was stirred at rt for 72 h. The residue was purified by flash column chromatography to afford white solid **10** (1.19 g, 52%).

**Table 1** The synthesis of calix[4]arenes **14-20** from thiophene and furan.

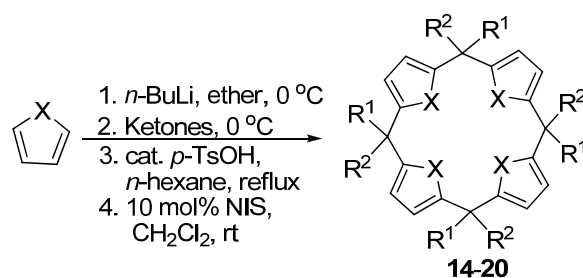

| Entry | X | R <sup>1</sup>                     | R <sup>2</sup> | Product   | Yield |
|-------|---|------------------------------------|----------------|-----------|-------|
| 1     | S | -(CH <sub>2</sub> ) <sub>6</sub> - |                | <b>14</b> | 56    |
| 2     | S | Et                                 | Et             | <b>15</b> | 62    |
| 3     | S | <i>n</i> -Pr                       | <i>n</i> -Pr   | <b>16</b> | 58    |
| 4     | S | <i>n</i> -Bu                       | <i>n</i> -Bu   | <b>17</b> | 66    |
| 5     | O | -(CH <sub>2</sub> ) <sub>6</sub> - |                | <b>18</b> | 42    |
| 6     | O | -(CH <sub>2</sub> ) <sub>7</sub> - |                | <b>19</b> | 51    |
| 7     | O | <i>n</i> -Bu                       | <i>n</i> -Bu   | <b>20</b> | 47    |

**Tetraspirocycloheptyl calix[4]thiophene (14)**

mp 338-339 °C; (Found: C, 74.31; H, 7.76. C<sub>44</sub>H<sub>56</sub>S<sub>4</sub> requires C, 74.10; H, 7.91%);  $\nu_{max}$  (film)/cm<sup>-1</sup> 3092, 3072, 3060, 2932, 2920, 2850, 1638, 1618, 1462, 1443, 795, 786, 755;  $\delta_H$ (300 MHz; CDCl<sub>3</sub>) 6.59 (8 H, s, thiophene  $\beta$ -H), 2.33-2.19 (16 H, br m, cycloheptyl), 1.68-1.50 (32 H, br m, cycloheptyl);  $\delta_C$ (75 MHz; CDCl<sub>3</sub>) 156.0 (C), 119.5 (CH), 47.5 (C), 41.9 (CH<sub>2</sub>), 29.8 (CH<sub>2</sub>), 23.4 (CH<sub>2</sub>); MS (FAB)  $m/z$  712 (M<sup>+</sup>, 10), 136 (100); HRMS (FAB) Calcd for C<sub>44</sub>H<sub>56</sub>S<sub>4</sub>  $m/z$  712.3265 (M<sup>+</sup>), found 712.3270. CCDC 768514.

**Octaethyl calix[4]thiophene (15)**

mp 317.5-318 °C; (Found: C, 70.98; H, 7.65. C<sub>36</sub>H<sub>48</sub>S<sub>4</sub> requires C, 71.00; H, 7.94%);  $\nu_{max}$  (film)/cm<sup>-1</sup> 3100, 3079, 3066, 2965, 2933, 2875, 1638, 1617, 1477, 1457, 1378, 789, 780;  $\delta_H$ (300 MHz; CDCl<sub>3</sub>) 6.58 (8 H, s, thiophene  $\beta$ -H), 2.0 (16 H, q,  $J$  7.3, CH<sub>2</sub>CH<sub>3</sub>), 0.71 (24 H, t,  $J$  7.3, CH<sub>2</sub>CH<sub>3</sub>);  $\delta_C$ (75 MHz; CDCl<sub>3</sub>) 154.5 (C), 120.5 (CH), 47.2 (C), 29.8 (CH<sub>2</sub>), 8.1 (CH<sub>3</sub>); MS (EI)  $m/z$  608 (M<sup>+</sup>, 9), 579 (100); HRMS (EI) Calcd for C<sub>36</sub>H<sub>48</sub>S<sub>4</sub>  $m/z$  608.2639 (M<sup>+</sup>), found 608.2635. CCDC 768517.

**Octapropyl calix[4]thiophene (16)**

mp 341.5-342.5 °C; (Found: C, 73.08; H, 8.79. C<sub>44</sub>H<sub>64</sub>S<sub>4</sub> requires C, 73.27; H, 8.94%);  $\nu_{max}$  (film)/cm<sup>-1</sup> 3096, 3076, 2956, 2932, 2870, 1638, 1618, 1475, 1464, 1457, 1379, 796, 773;  $\delta_H$ (300 MHz; CDCl<sub>3</sub>) 6.55 (8 H, s, thiophene  $\beta$ -H), 1.96-1.90 (16 H, m, CH<sub>2</sub>CH<sub>2</sub>CH<sub>3</sub>), 1.18-1.05 (16 H, m, CH<sub>2</sub>CH<sub>2</sub>CH<sub>3</sub>), 0.86 (24 H, t,  $J$  7.2, CH<sub>2</sub>CH<sub>2</sub>CH<sub>3</sub>);  $\delta_C$ (75 MHz; CDCl<sub>3</sub>) 154.9 (C), 120.0 (CH), 46.8 (C), 40.3 (CH<sub>2</sub>), 17.1 (CH<sub>2</sub>), 14.5 (CH<sub>3</sub>); MS (EI)  $m/z$  720 (M<sup>+</sup>, 6), 677 (100); HRMS (EI) Calcd for C<sub>44</sub>H<sub>64</sub>S<sub>4</sub>  $m/z$  720.3891 (M<sup>+</sup>), found 720.3886. CCDC 768512.

**Octabutyl calix[4]thiophene (17)**

mp 286.5-287.5 °C; (Found: C, 75.01; H, 9.67. C<sub>52</sub>H<sub>80</sub>S<sub>4</sub> requires C, 74.94; H, 9.67%);  $\nu_{max}$  (film)/cm<sup>-1</sup> 3097, 3077, 2954, 2932, 2862, 1638, 1618, 1465, 1378, 789;  $\delta_H$ (300 MHz; CDCl<sub>3</sub>) 6.55 (8 H, s, thiophene  $\beta$ -H), 1.96-1.91 (16 H, m, CH<sub>2</sub>CH<sub>2</sub>CH<sub>2</sub>CH<sub>3</sub>), 1.25 (16 H, sextet,  $J$  7.2, CH<sub>2</sub>CH<sub>2</sub>CH<sub>2</sub>CH<sub>3</sub>), 1.15-0.98 (16 H, br m, CH<sub>2</sub>CH<sub>2</sub>CH<sub>2</sub>CH<sub>3</sub>), 0.81 (24 H, t,  $J$  7.2, CH<sub>2</sub>CH<sub>2</sub>CH<sub>2</sub>CH<sub>3</sub>);  $\delta_C$ (75 MHz; CDCl<sub>3</sub>) 155.1 (C), 120.0 (CH), 46.7 (C), 37.5 (CH<sub>2</sub>), 25.9 (CH<sub>2</sub>), 22.9 (CH<sub>2</sub>), 13.9 (CH<sub>3</sub>); MS (FAB)  $m/z$  833 ([M + 1]<sup>+</sup>, 1.4), 154 (100); HRMS (FAB) Calcd for C<sub>52</sub>H<sub>80</sub>S<sub>4</sub>  $m/z$  833.5221 [M + H]<sup>+</sup>, found 833.5234. CCDC 768518.

**Tetraspirocycloheptyl calix[4]furan (18)**

mp 233-234 °C; (Found: C, 81.57; H, 9.08. C<sub>44</sub>H<sub>56</sub>O<sub>4</sub> requires C, 81.44; H, 8.70%);  $\nu_{max}$  (film)/cm<sup>-1</sup> 2942, 2920, 2856, 1638, 1617, 1548, 1464, 1446, 1201, 1020, 776, 763;  $\delta_H$ (300 MHz; CDCl<sub>3</sub>) 5.87 (8 H, s, furan  $\beta$ -H), 2.10-1.99 (16 H, br m, cycloheptyl), 1.56-1.37 (32 H, br m, cycloheptyl);  $\delta_C$ (75 MHz; CDCl<sub>3</sub>) 158.3 (C), 103.7 (CH), 44.3 (C), 35.6 (CH<sub>2</sub>), 29.7 (CH<sub>2</sub>), 22.6 (CH<sub>2</sub>); MS (EI)  $m/z$  648 (M<sup>+</sup>, 100); HRMS (EI) Calcd for C<sub>44</sub>H<sub>56</sub>O<sub>4</sub>  $m/z$  648.4179 (M<sup>+</sup>), found 648.4185. CCDC 768513.

**Tetraspirocyclooctyl calix[4]furan (19)**

mp 306-307 °C; (Found: C, 82.01; H, 9.21. C<sub>48</sub>H<sub>64</sub>O<sub>4</sub> requires C, 81.77; H, 9.15%);  $\nu_{max}$  (film)/cm<sup>-1</sup> 2947, 2916, 2846, 1638, 1618, 1551, 1479, 1446, 1188, 1059, 1027, 774;  $\delta_H$ (300 MHz; CDCl<sub>3</sub>) 5.91 (8 H, s, furan  $\beta$ -H), 2.09-1.97 (16 H, br m, cyclooctyl), 1.58-1.41 (24 H, br m, cyclooctyl), 1.38-1.24 (16 H, br m, cyclooctyl);  $\delta_C$ (75 MHz; CDCl<sub>3</sub>) 157.2 (C), 104.6 (CH), 44.4 (C), 29.9 (CH<sub>2</sub>), 28.5 (CH<sub>2</sub>), 25.0 (CH<sub>2</sub>), 22.1 (CH<sub>2</sub>); MS (EI)  $m/z$  704 (M<sup>+</sup>, 100); HRMS (EI) Calcd for C<sub>48</sub>H<sub>64</sub>O<sub>4</sub>  $m/z$  704.4805 (M<sup>+</sup>), found 704.4807. CCDC 768515.

**Octabutyl calix[4]furan (20)**

mp 271.5-272.5 °C; (Found: C, 81.27; H, 10.58. C<sub>52</sub>H<sub>80</sub>O<sub>4</sub> requires C, 81.20; H, 10.48%);  $\nu_{max}$  (film)/cm<sup>-1</sup> 2956, 2918, 2872, 2859, 1639, 1617, 1601, 1551, 1467, 1379, 1198, 1023, 777, 754;  $\delta_H$ (300 MHz; CDCl<sub>3</sub>) 5.87 (8 H, s, furan  $\beta$ -H), 1.87-1.73 (16 H, br m, CH<sub>2</sub>CH<sub>2</sub>CH<sub>2</sub>CH<sub>3</sub>), 1.22 (16 H, sextet,  $J$  7.3, CH<sub>2</sub>CH<sub>2</sub>CH<sub>2</sub>CH<sub>3</sub>), 0.99-0.80 (16 H, m, CH<sub>2</sub>CH<sub>2</sub>CH<sub>2</sub>CH<sub>3</sub>), 0.82 (24 H, t,  $J$  7.3, CH<sub>2</sub>CH<sub>2</sub>CH<sub>2</sub>CH<sub>3</sub>);  $\delta_C$ (75 MHz; CDCl<sub>3</sub>) 156.8 (C), 104.6 (CH), 43.5 (C), 32.0 (CH<sub>2</sub>), 25.5 (CH<sub>2</sub>), 23.2 (CH<sub>2</sub>), 14.1 (CH<sub>3</sub>); MS (FAB)  $m/z$  768 (M<sup>+</sup>, 3), 154 (100); HRMS (FAB) Calcd for C<sub>52</sub>H<sub>80</sub>O<sub>4</sub>  $m/z$  768.6057 (M<sup>+</sup>), found 768.6058. CCDC 768519.

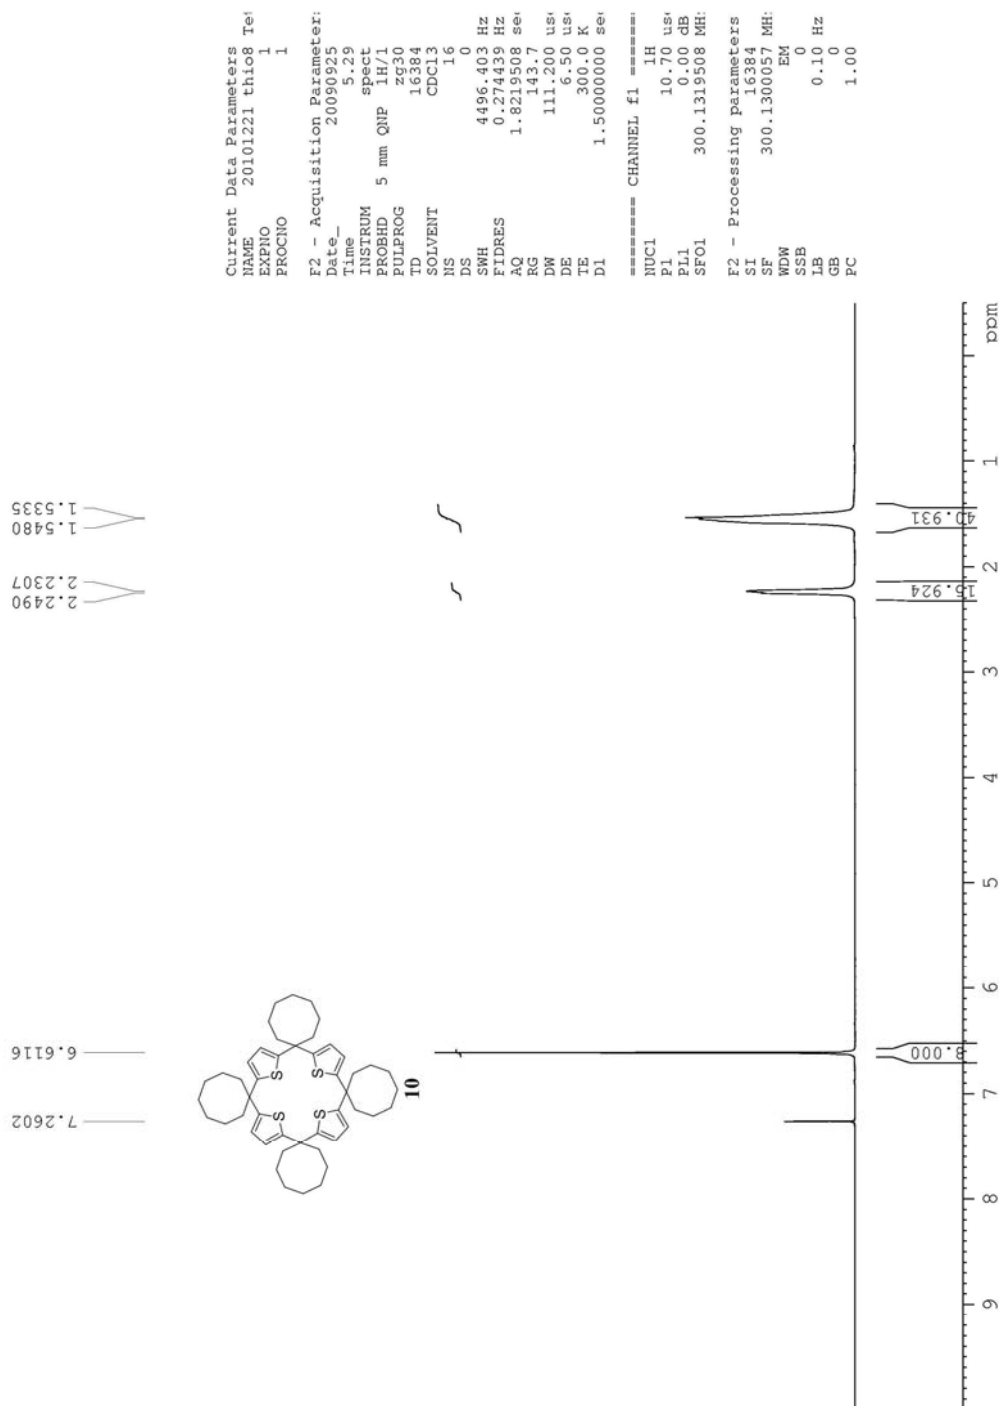

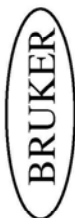

Current Data Parameters  
NAME 20101221 thios Tet  
EXPNO 2  
PROCNO 1

F2 - Acquisition Parameters  
Date\_ 20081124  
Time 10.13  
INSTRUM spect  
PROBHD 5 mm QNP 1H/1  
PULPROG zgpg30  
TD 65536  
SOLVENT CDCl3  
NS 4096  
DS 0  
SWH 18832.393 Hz  
FIDRES 0.287360 Hz  
AQ 1.7400308 sec  
RG 676  
DW 26.550 usec  
DE 6.50 usec  
TE 300.0 K  
D1 1.20000005 sec  
d11 0.03000000 sec  
d12 0.00002000 sec

===== CHANNEL f1 =====  
NUC1 13C  
P1 10.10 usec  
PL1 0.00 dB  
SFO1 75.4763978 MHz

===== CHANNEL f2 =====  
CPDPRG2 waltz16  
NUC2 1H  
PCPD2 90.00 usec  
PL2 0.00 dB  
PL12 18.10 dB  
PL13 21.10 dB  
SFO2 300.1313506 MHz

F2 - Processing parameters  
SI 32768  
SF 75.4677500 MHz  
WDW EM  
SSB 0  
LB 3.00 Hz  
GB 0

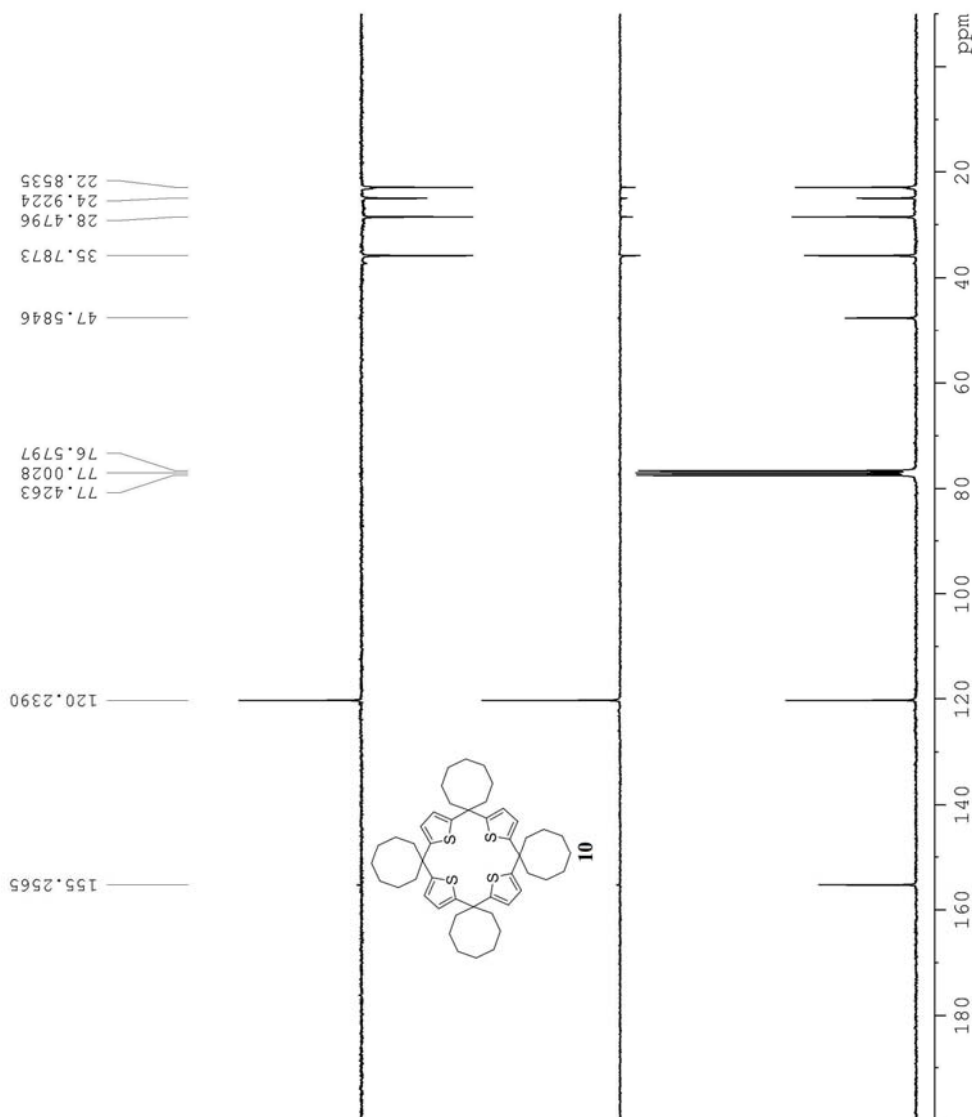



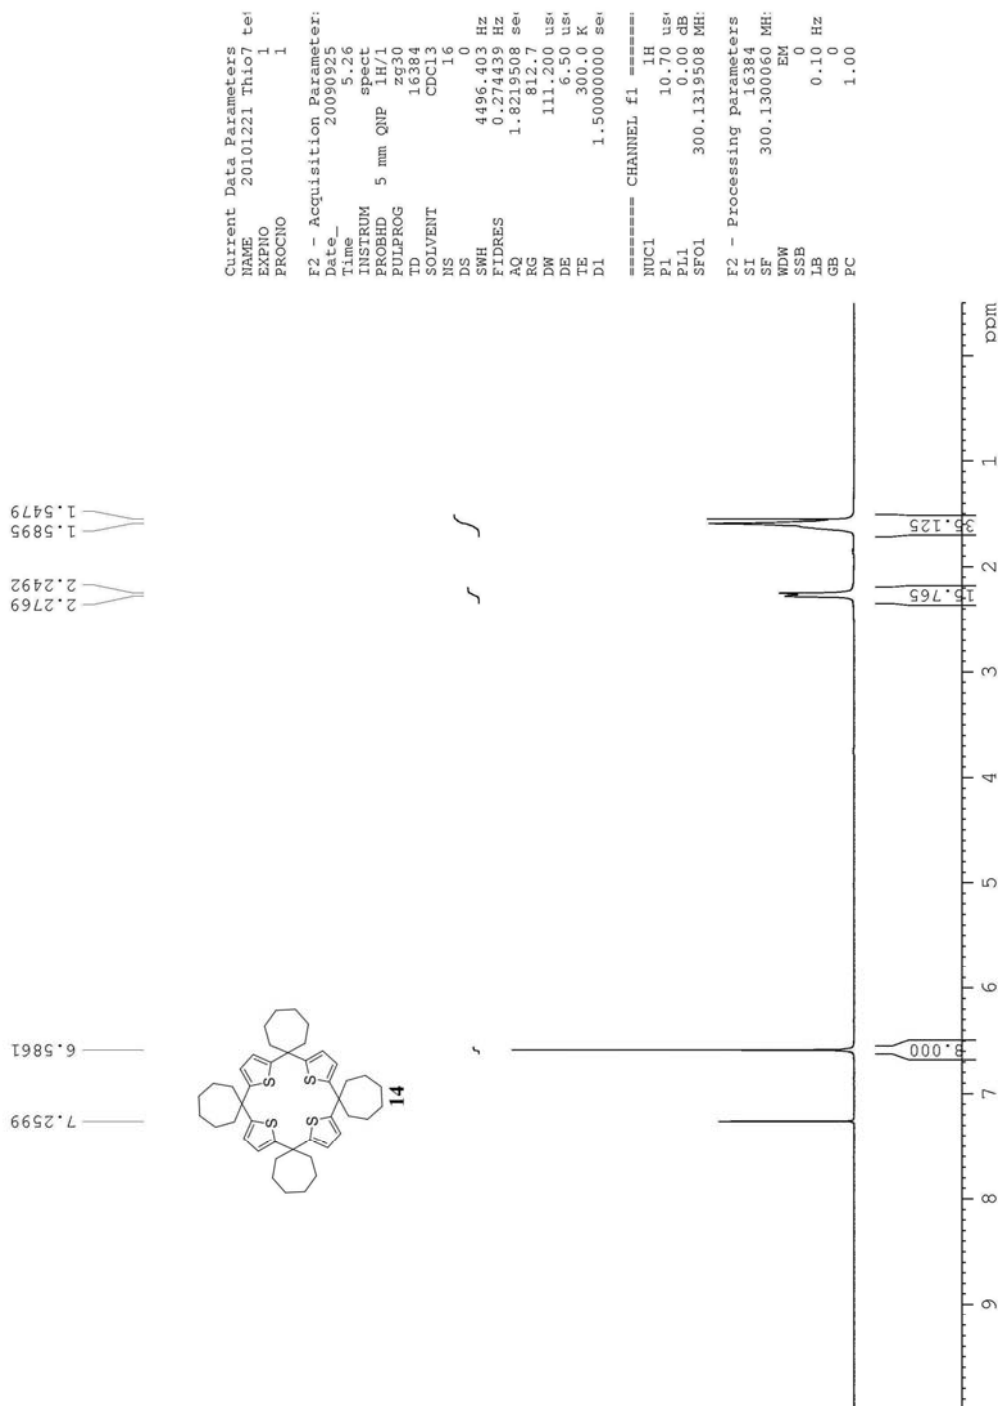

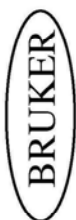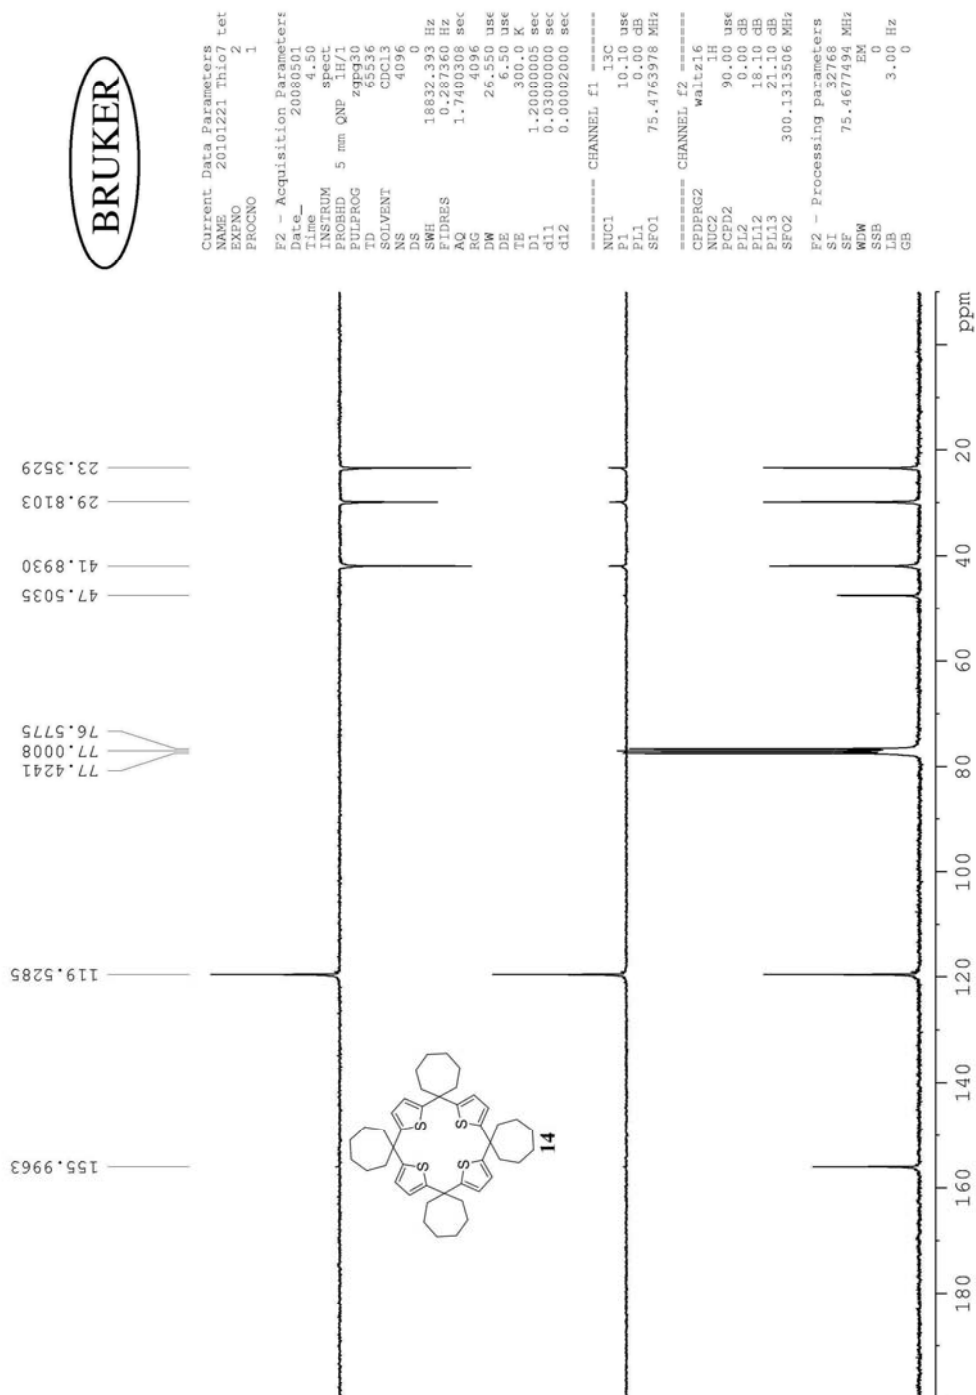

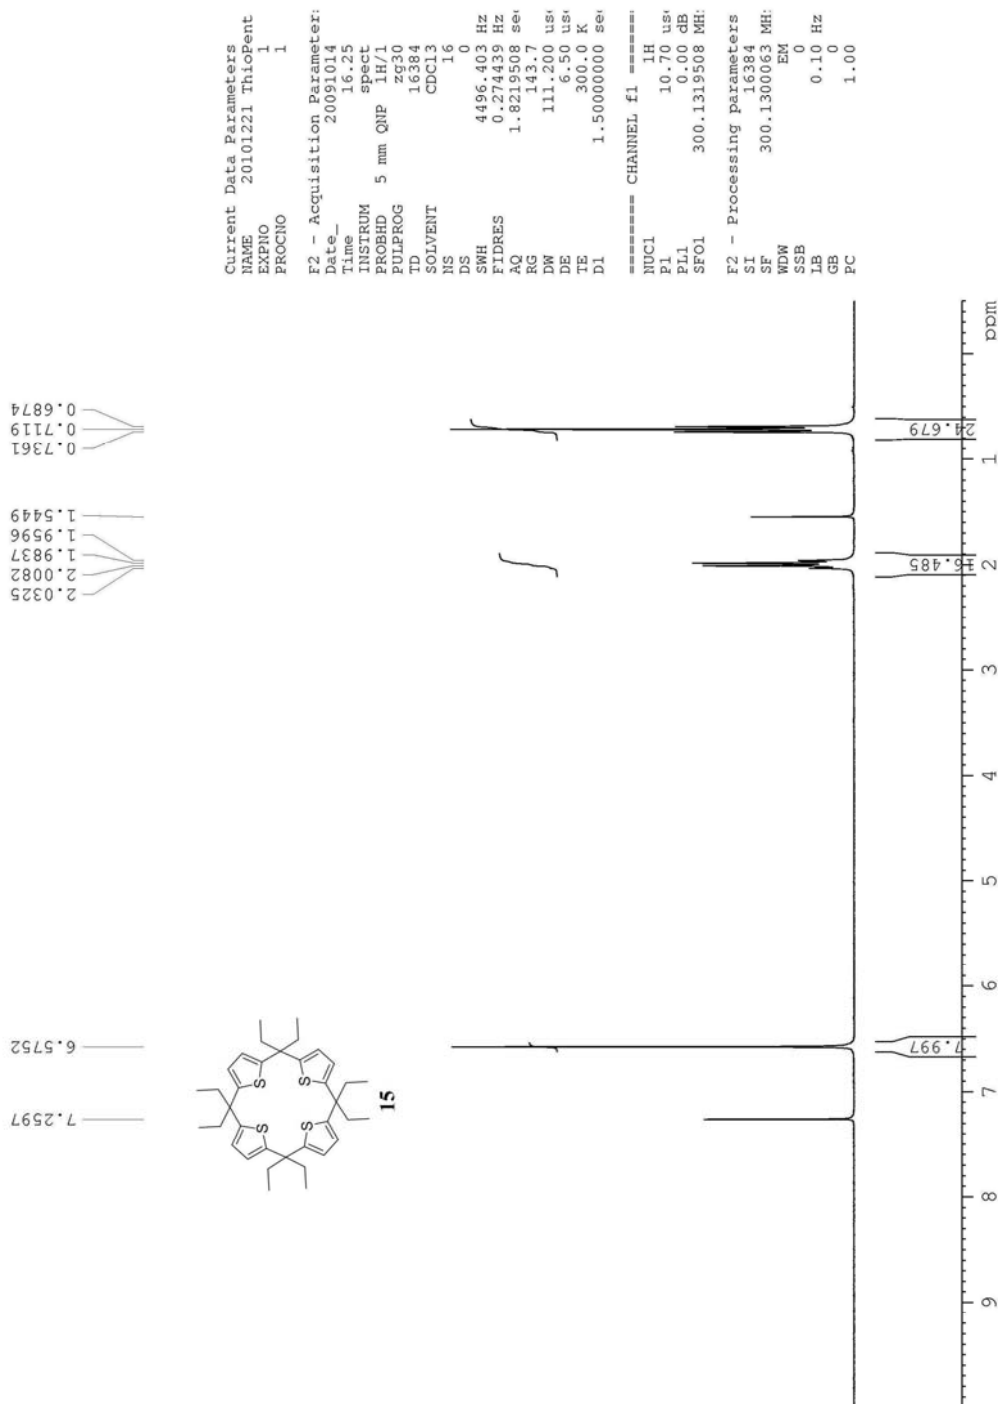

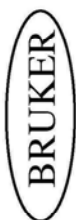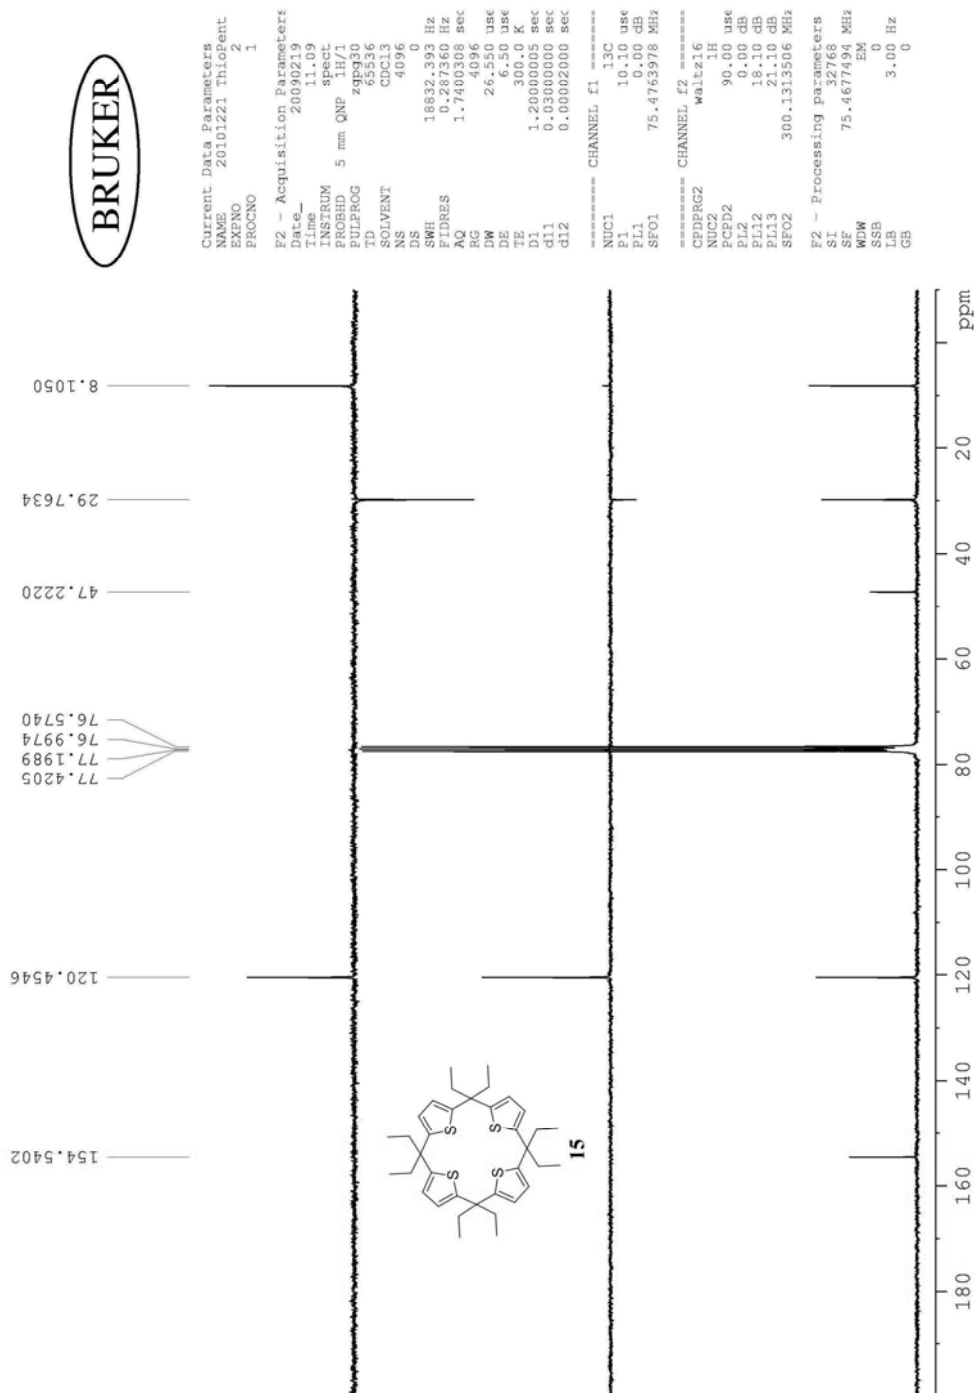

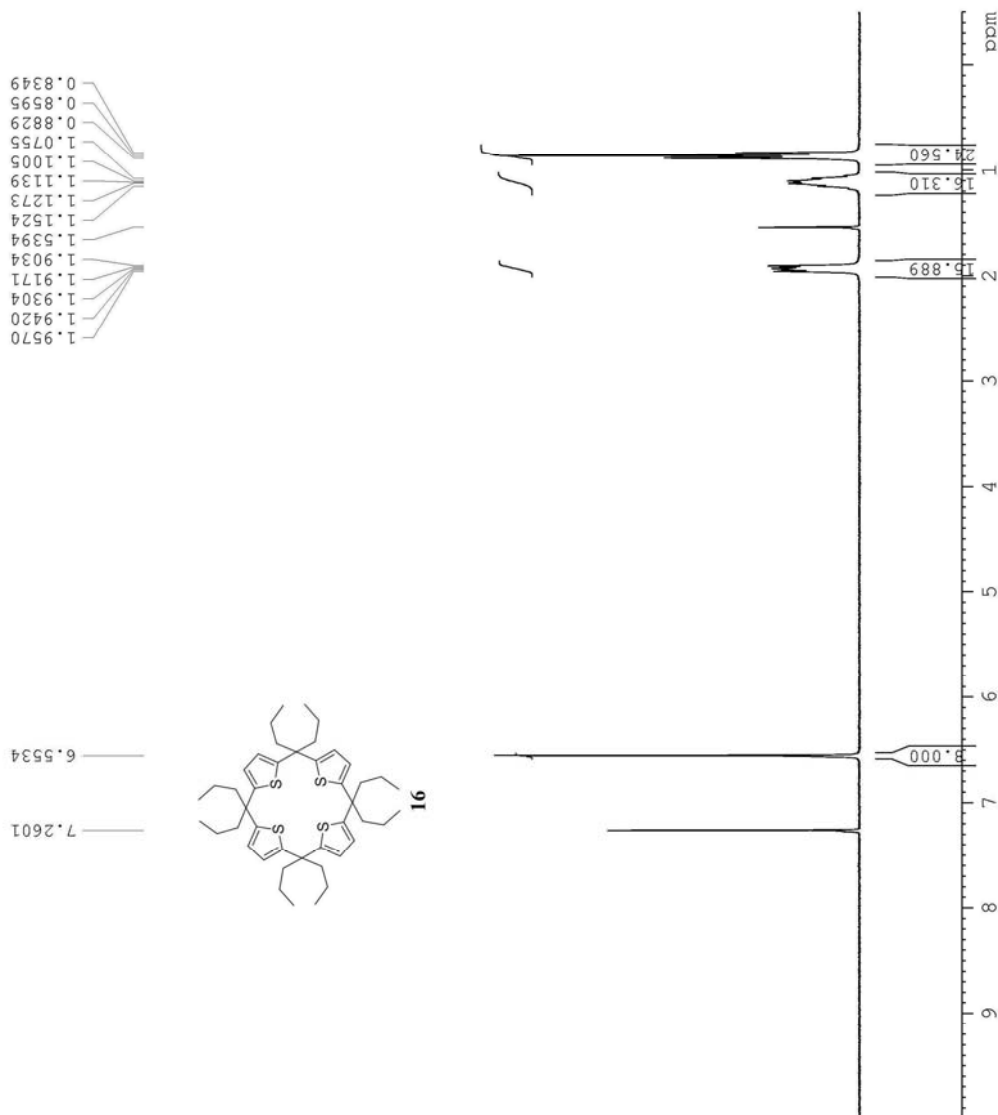

```

Current Data Parameters
NAME      20101221 ThioHept
EXPNO    1
PROCNO   1

F2 - Acquisition Parameters:
Date_    20090924
Time     22.19
INSTRUM spect
PROBHD   5 mm QNP 1H/1
PULPROG zg30
TD       16384
SOLVENT  CDCl3
NS       8
DS       0
SWH      4496.403 Hz
FIDRES   0.274439 Hz
AQ       1.8219508 sec
RG       143.7
DW       111.200 usec
DE       6.50 usec
TE       300.0 K
D1       1.50000000 sec

===== CHANNEL f1 =====
NUC1     1H
P1       10.70 usec
PL1     0.00 dB
SFO1     300.1319508 MHz

F2 - Processing parameters
SI       16384
SF       300.1300060 MHz
WDW      EM
SSB      0
LB       0.10 Hz
GB       0
PC       1.00
    
```

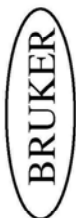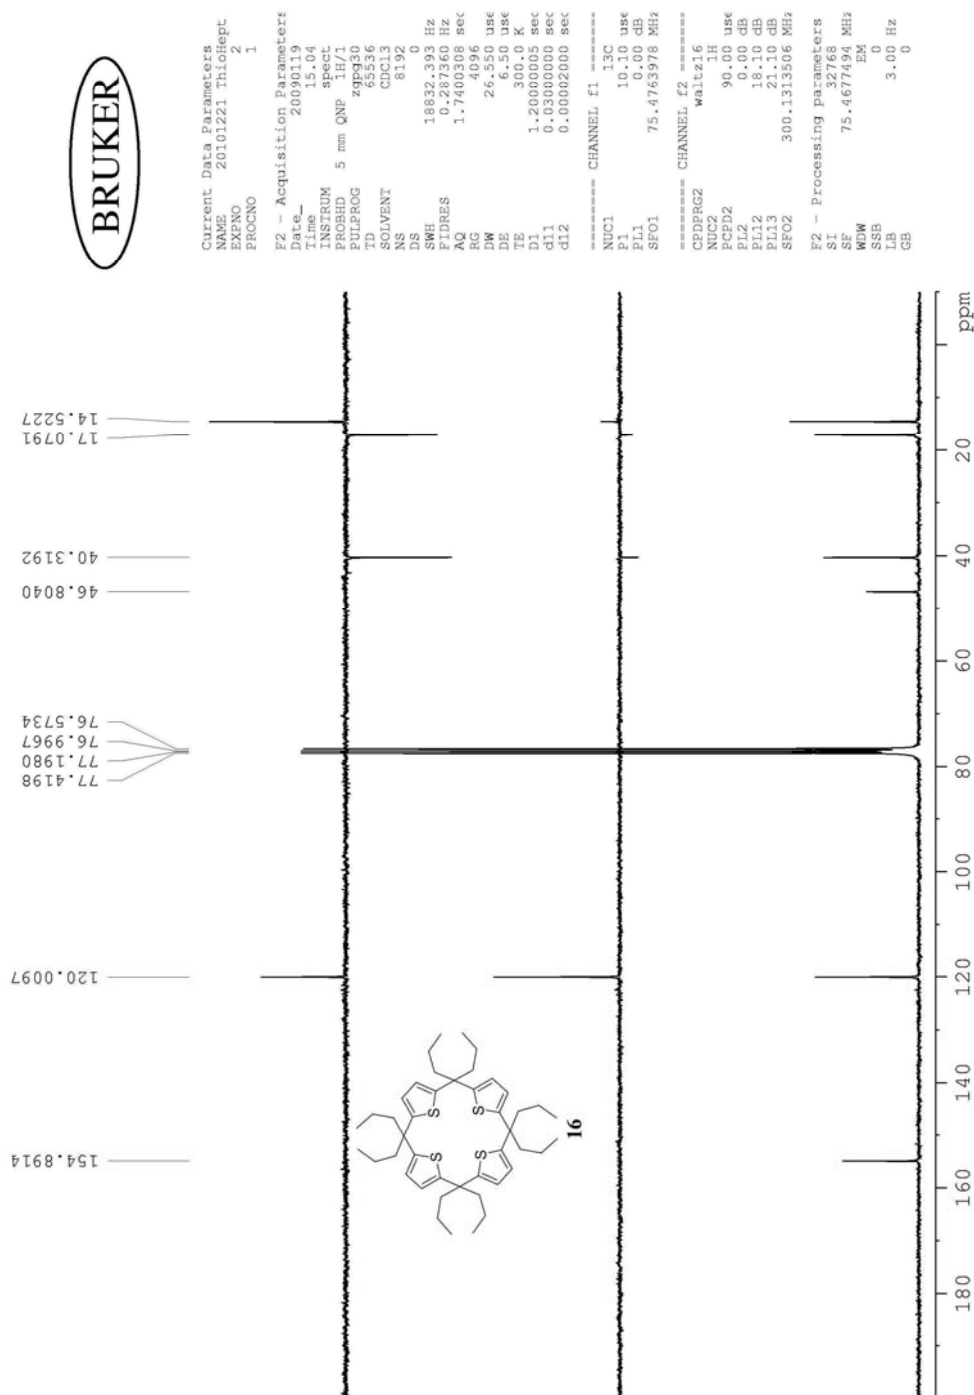

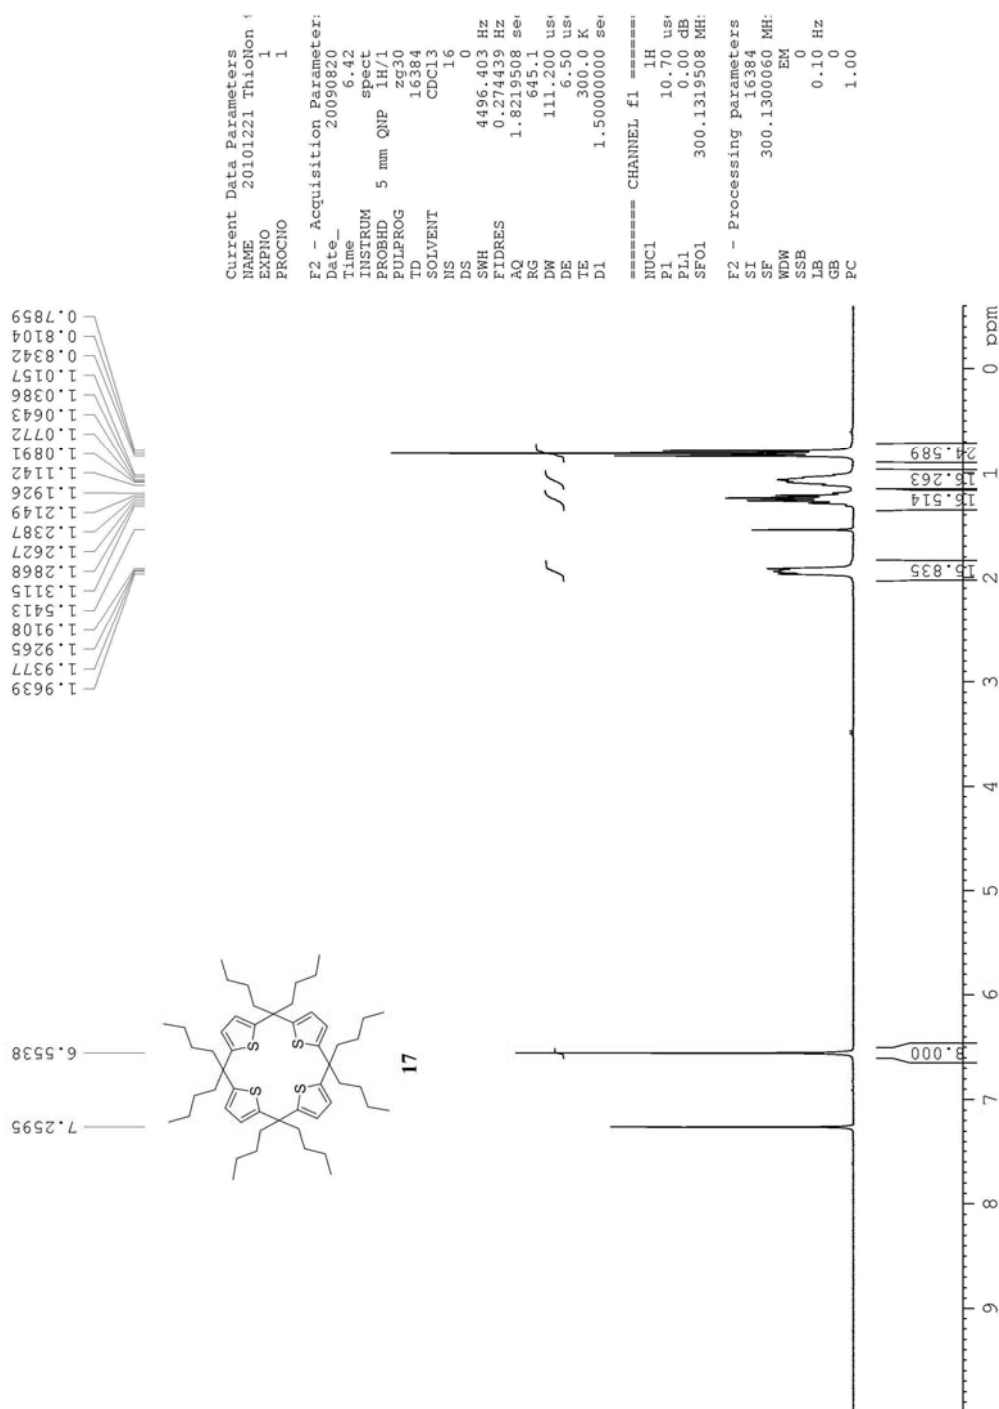

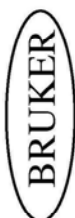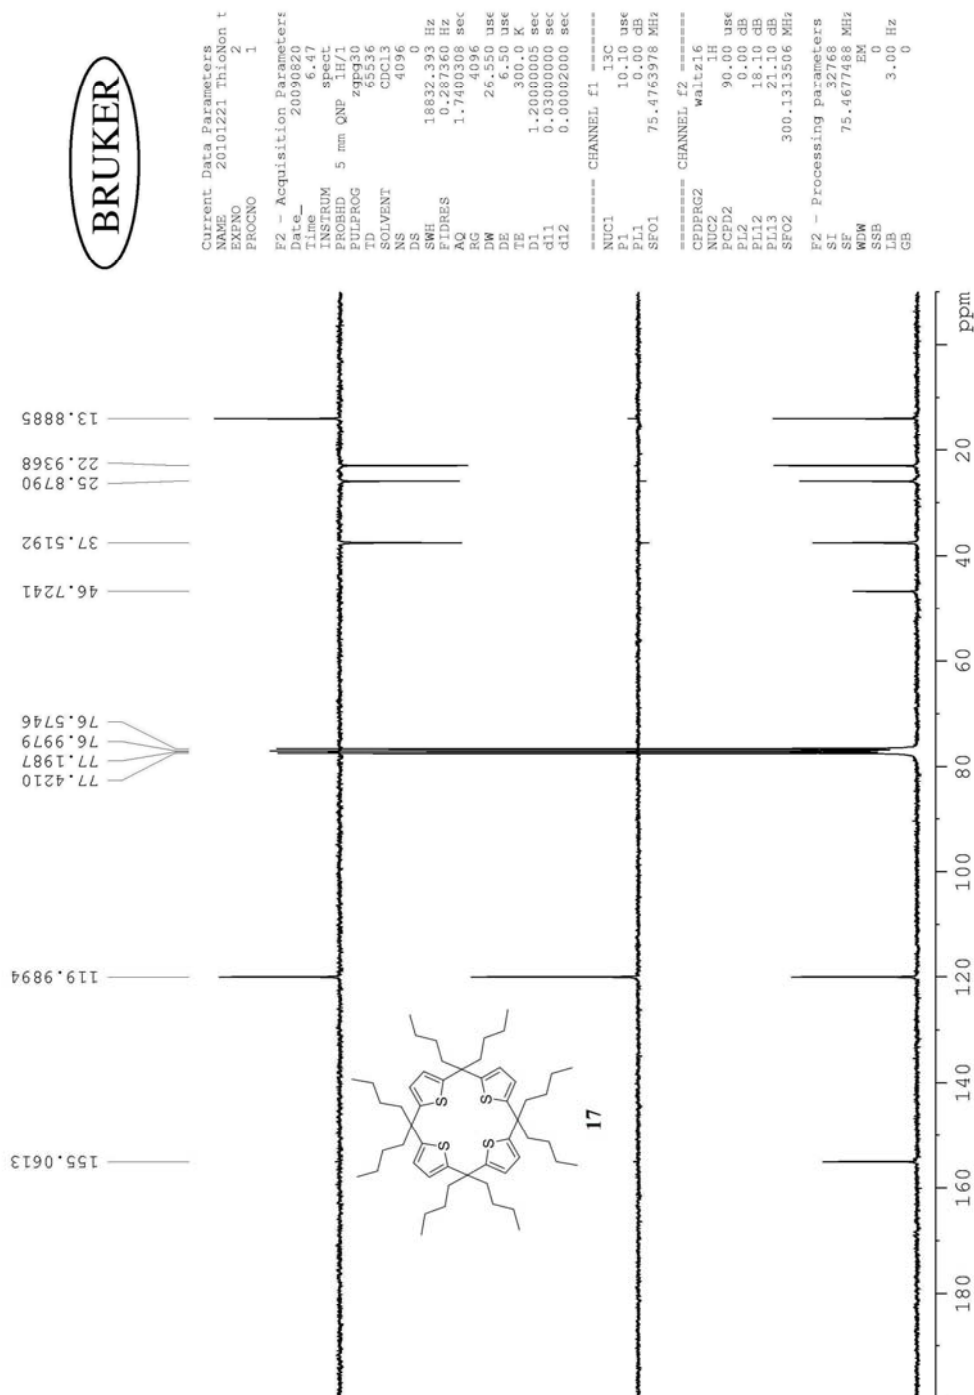



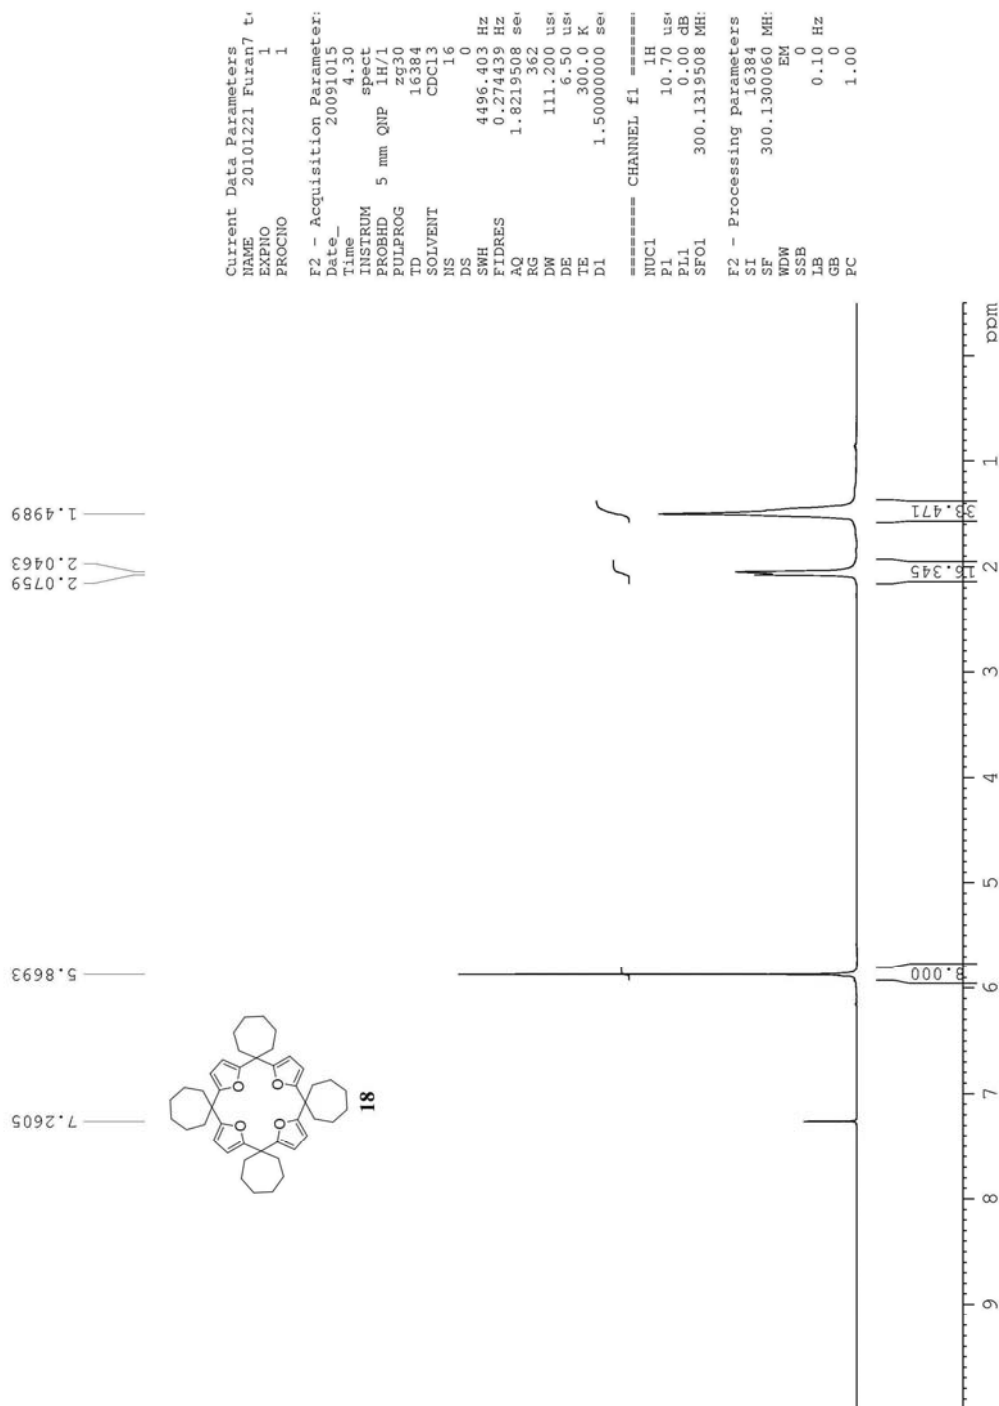



Current Data Parameters  
 NAME 20101221 Iuran/ene  
 EXPNO 2  
 PROCNO 1

F2 - Acquisition Parameters  
 Date\_ 20091015  
 Time 4.31  
 INSTRUM spect  
 PROBHD 5 mm QNP 1H/1  
 PULPROG zgpg30  
 TD 65536  
 SOLVENT CDCl3  
 NS 256  
 DS 0  
 SWH 18832.393 Hz  
 FIDRES 0.287360 Hz  
 AQ 1.7400308 sec  
 RG 676  
 DW 26.550 usec  
 DE 6.50 usec  
 TE 300.0 K  
 D1 1.20000005 sec  
 d11 0.03000000 sec  
 d12 0.00002000 sec

===== CHANNEL F1 =====  
 NUC1 13C  
 P1 10.10 usec  
 PL1 0.00 dB  
 SFO1 75.4763978 MHz

===== CHANNEL F2 =====  
 CPDPRG2 waltz16  
 NUC2 1H  
 PCPD2 90.00 usec  
 PL2 0.00 dB  
 PL12 18.10 dB  
 PL13 21.10 dB  
 SFO2 300.1313506 MHz

F2 - Processing parameters  
 SI 32768  
 SF 75.4677500 MHz  
 WDW EM  
 SSB 0  
 LB 3.00 Hz  
 GB 0

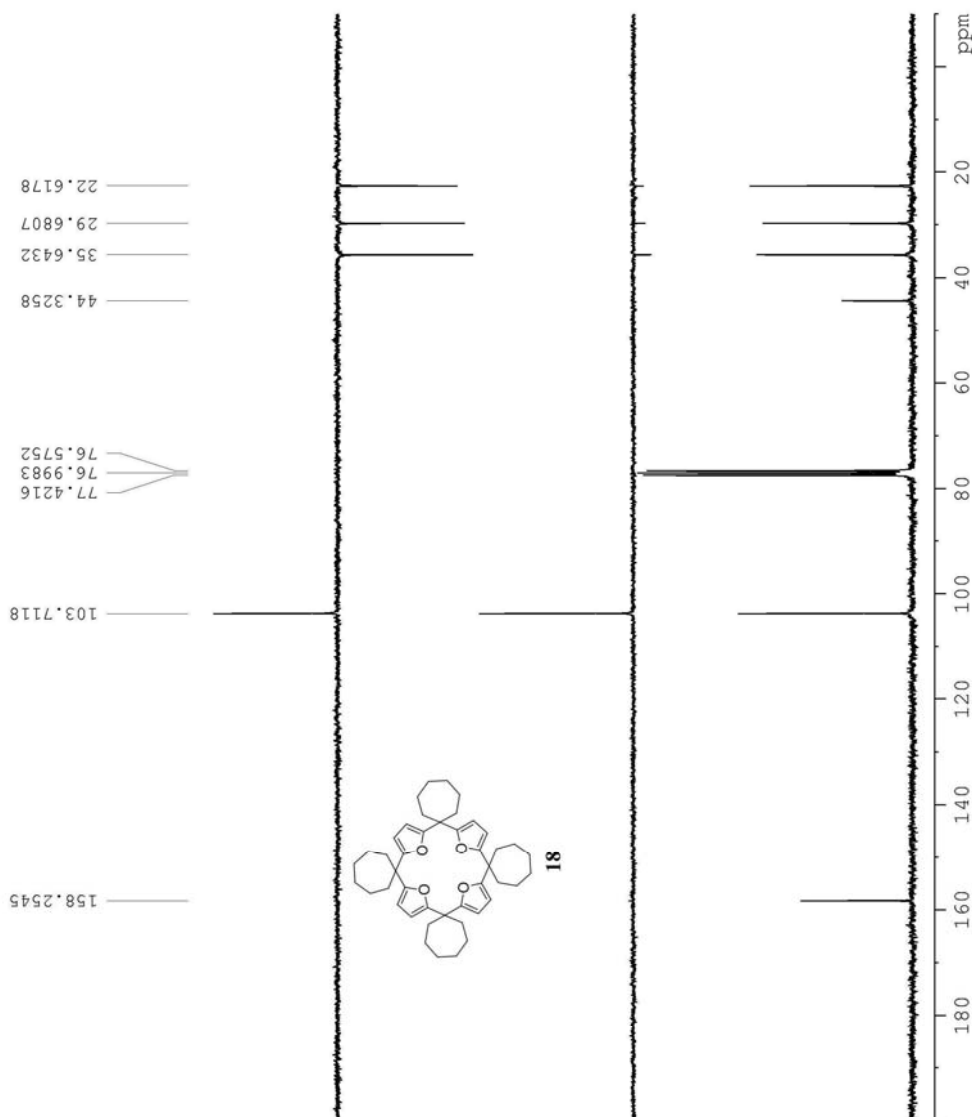

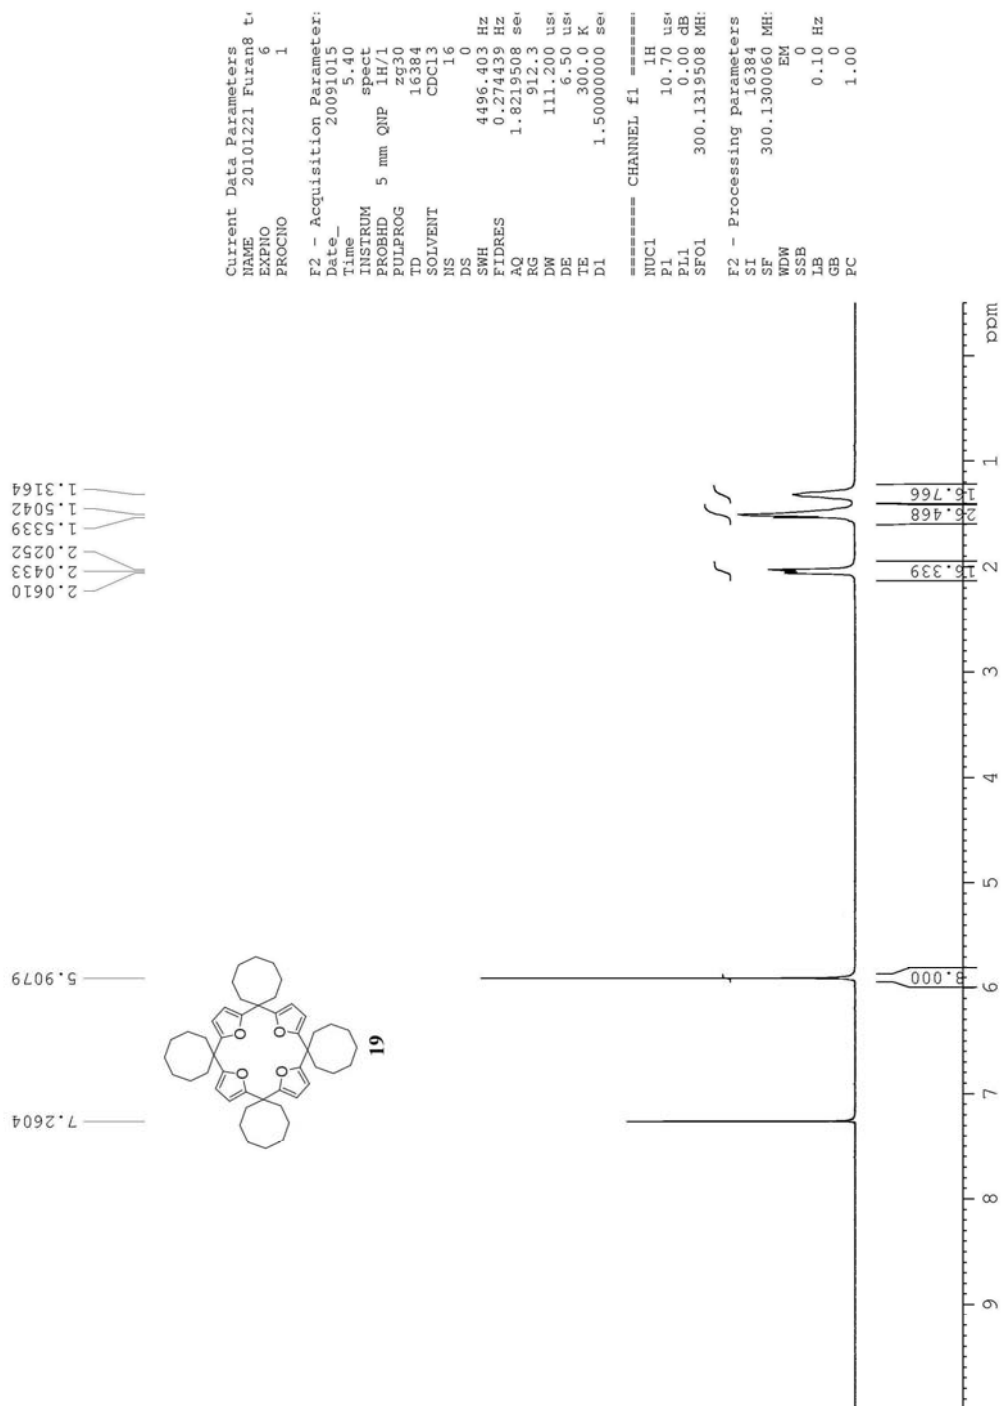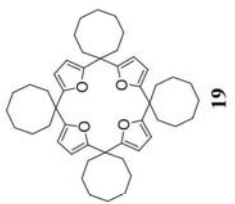

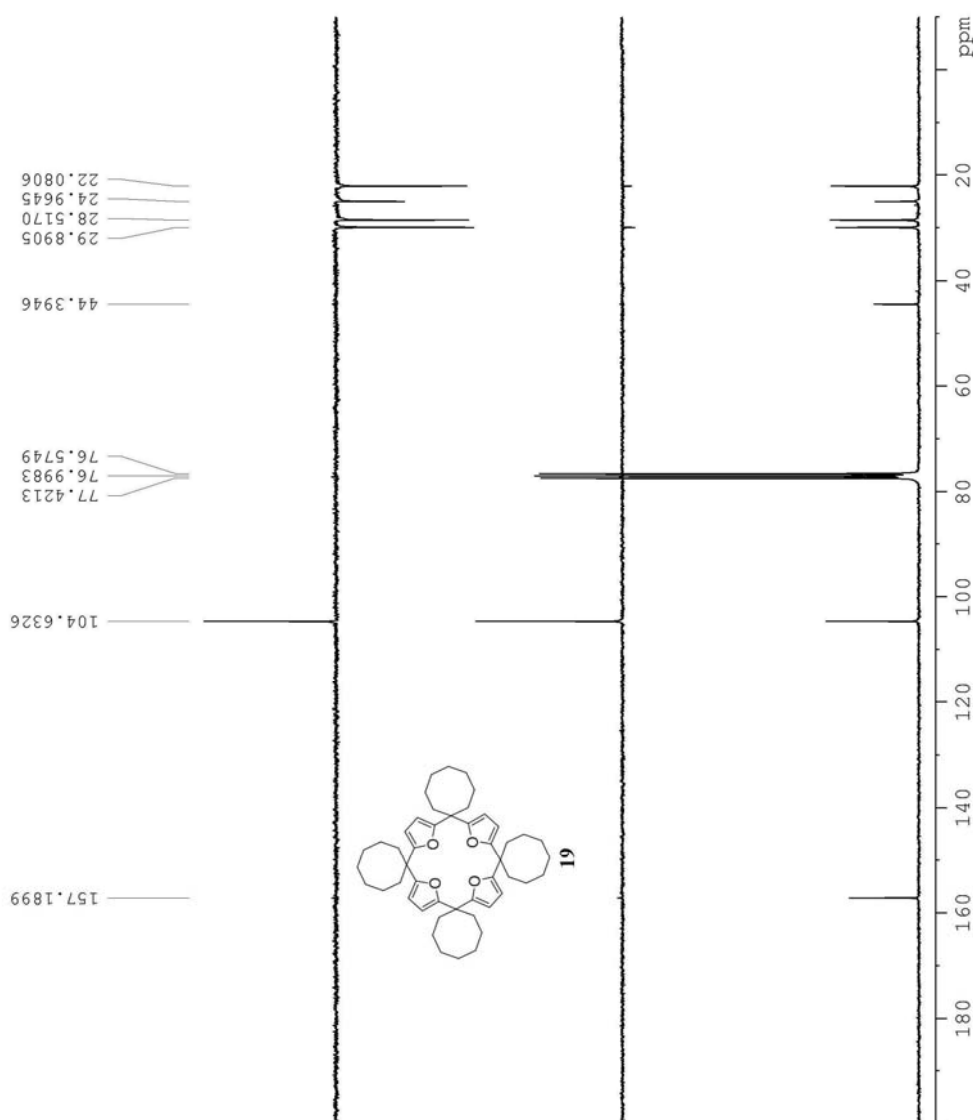

Current Data Parameters  
NAME 20101221 tetramer1  
EXPNO 2  
PROCNO 1

F2 - Acquisition Parameters  
Date\_ 20080630  
Time 5.48  
INSTRUM spect  
PROBHD 5 mm QNP 1H/1  
PULPROG zgpg30  
TD 65536  
SOLVENT CDCl3  
NS 6144  
DS 0  
SWH 18832.393 Hz  
FIDRES 0.287360 Hz  
AQ 1.7400308 sec  
RG 676  
DW 26.550 usec  
DE 6.50 usec  
TE 300.0 K  
D1 1.20000000 sec  
d11 0.03000000 sec  
d12 0.00002000 sec

===== CHANNEL f1 =====  
NUC1 13C  
P1 10.10 usec  
PL1 0.00 dB  
SFO1 75.4763978 MHz

===== CHANNEL f2 =====  
CPDPRG2 waltz16  
NUC2 1H  
PCPD2 90.00 usec  
PL2 0.00 dB  
PL12 18.10 dB  
PL13 21.10 dB  
SFO2 300.1313506 MHz

F2 - Processing parameters  
SI 32768  
SF 75.4677482 MHz  
WDW EM  
SSB 0  
LB 3.00 Hz  
GB 0

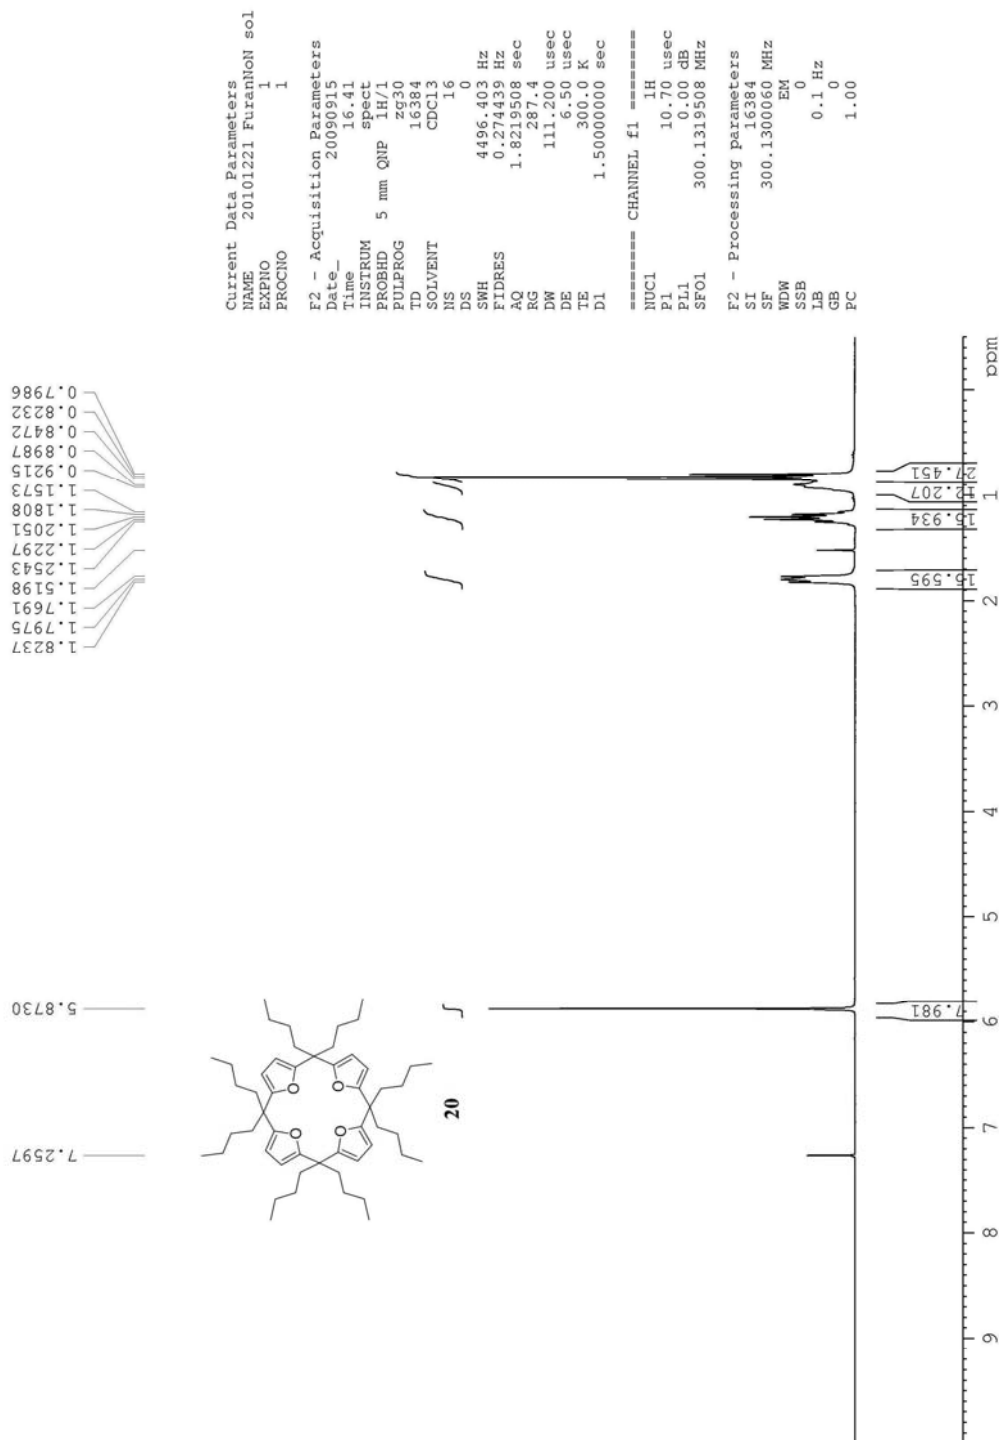

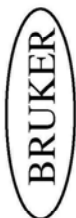

Current Data Parameters  
 NAME 20101221 FuranON  
 EXPNO 2  
 PROCNO 1

F2 - Acquisition Parameters  
 Date\_ 20090915  
 Time 16.52  
 INSTRUM spect  
 PROBHD 5 mm QNP 1H/1  
 PULPROG zgpg30  
 TD 65536  
 SOLVENT CDCl3  
 NS 211  
 DS 0  
 SWH 18832.393 Hz  
 FIDRES 0.287360 Hz  
 AQ 1.7400308 sec  
 RG 406  
 DW 26.550 usec  
 DE 6.50 usec  
 TE 300.0 K  
 D1 1.20000005 sec  
 d11 0.03000000 sec  
 d12 0.00002000 sec

===== CHANNEL F1 =====  
 NUC1 13C  
 P1 10.10 usec  
 PL1 0.00 dB  
 SFO1 75.4763978 MHz

===== CHANNEL F2 =====  
 CPDPRG2 waltz16  
 NUC2 1H  
 PCPD2 90.00 usec  
 PL2 0.00 dB  
 PL12 18.10 dB  
 PL13 21.10 dB  
 SFO2 300.1313506 MHz

F2 - Processing parameters  
 SI 32768  
 SF 75.4677494 MHz  
 WDW EM  
 SSB 0  
 LB 3.00 Hz  
 GB 0

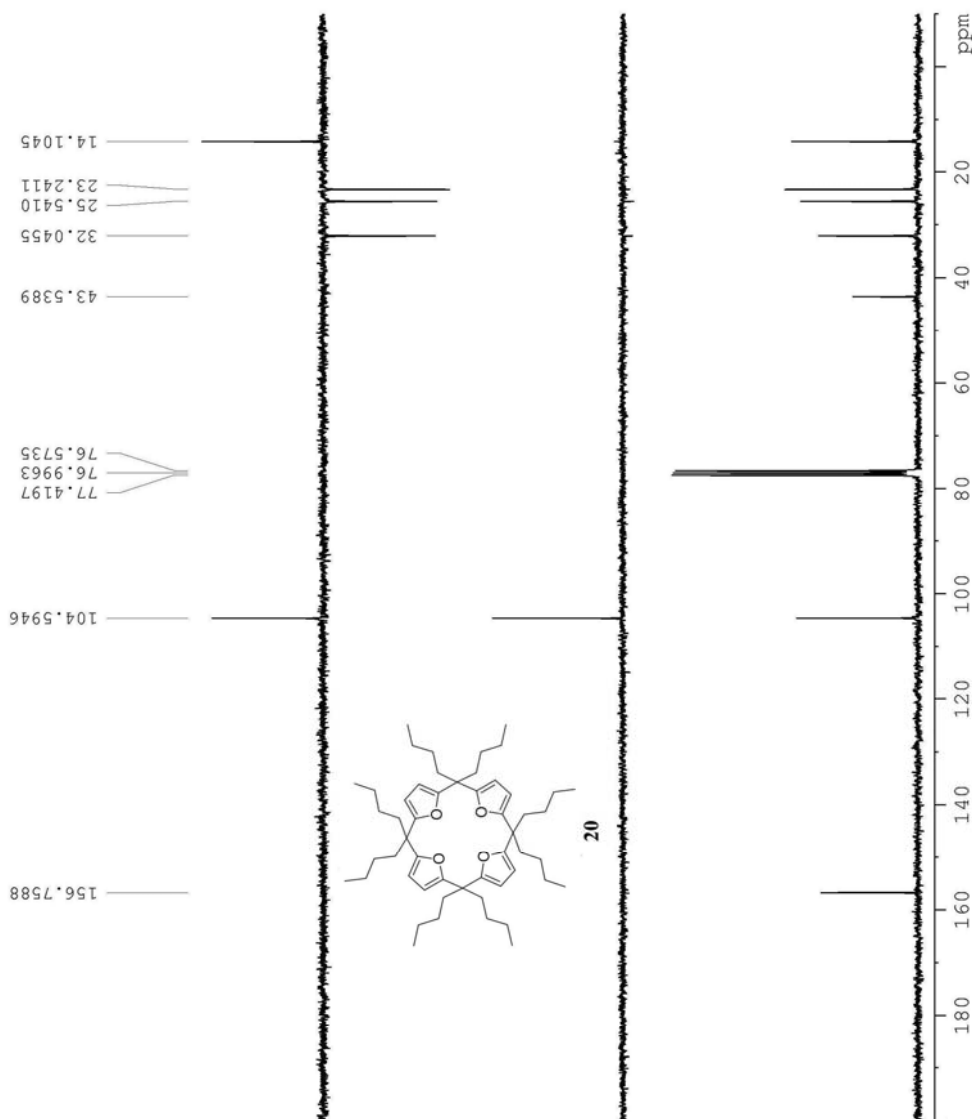

Supplement: c0cc00437e.pdf [file c0cc00437e.pdf]
